# Supplementary material for: Acute and chronic neuroinflammation is triggered by diabetic ketoacidosis in a rat model
Source: HighWire-hosted journal article supplement (doi:10.1136/bmjdrc-2020-001793), 2020-12-01
Supplement: bmjdrc-2020-001793supp002_data_supplement.pdf [file bmjdrc-2020-001793supp002_data_supplement.pdf]

**Supplemental Figure 2.****Serum matrix metalloproteinase concentrations in adult rats with and without DKA as juveniles**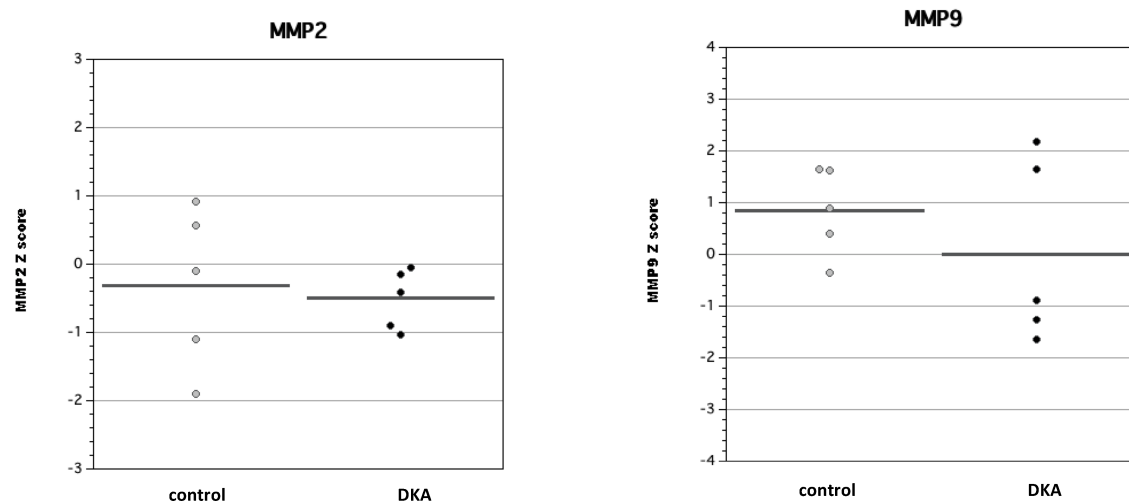**Brain matrix metalloproteinase concentrations in adult rats with and without DKA as juveniles\***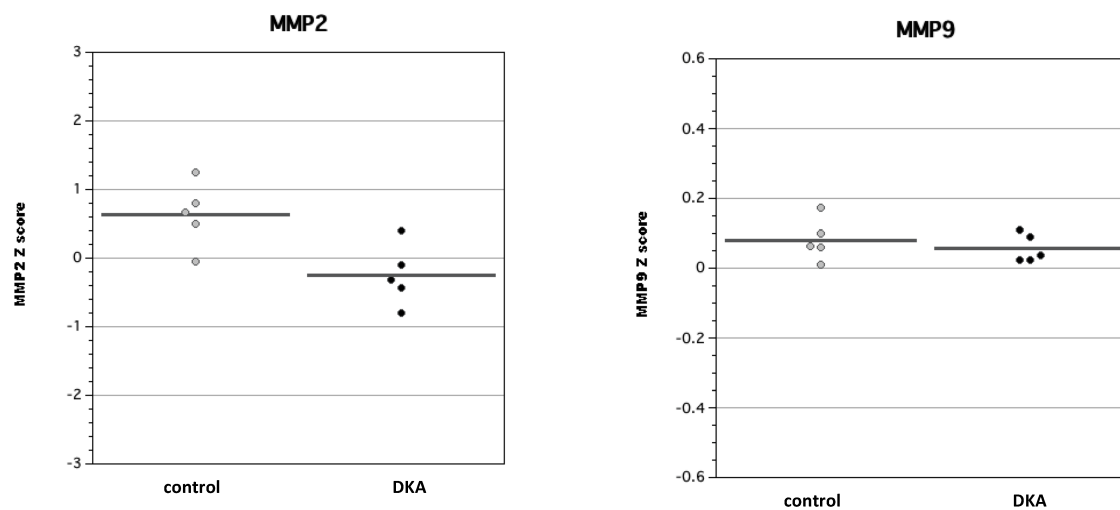

\*Brain MMP2 DKA vs hyperglycemic control  $p=0.001$  [Mean difference (95%CI) = -0.88 (-1.42, -0.35)]
